# Supplementary material
Source: PubMed Central journal article supplement (PMC1895233)

**Fig. 1S**

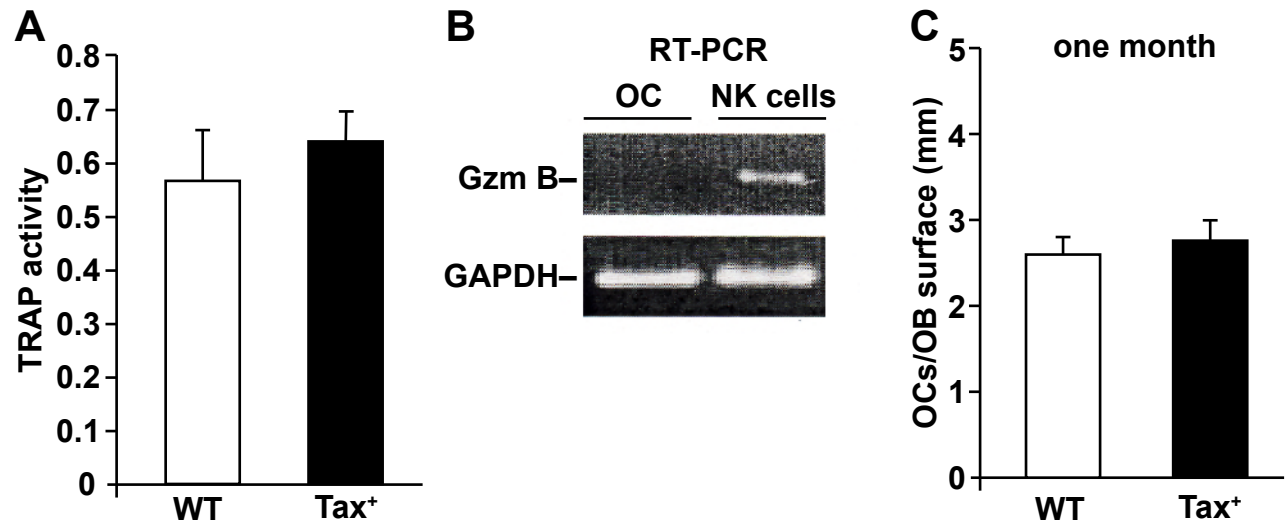

Supplement: blood_2005-04-1730_1.pdf [file blood_2005-04-1730_1.pdf]

**Fig. 2S**

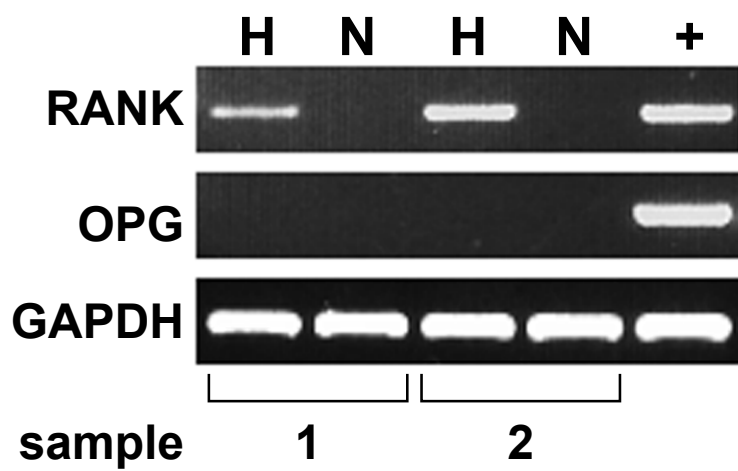

Supplement: blood_2005-04-1730_2.pdf [file blood_2005-04-1730_2.pdf]
